# Supplementary material for: Entry into and Completion of Vocational Baccalaureate School in Switzerland: Do Differences in Regional Admission Regulations Matter?
Source: MDPI journal article supplement (doi:10.3390/educsci12030188), 2022-03-08
Supplement: s1 [file s1]

## **Supplementary Material: Entry into and completion of vocational baccalaureate school in Switzerland: Do differences in regional admission regulations matter?**

Table S1: Entry requirements into FVB1 and FVB2 school in Swiss cantons

Table S2: Individual and contextual determinants for entry into FVB1- and FVB2-school (regression results)

Table S3: Individual and contextual determinants for the successful completion of FVB1 and FVB2 (Heckprobit models)

Table S4: Individual and contextual determinants for entry into FVB2-school (logistic regression models)

Table S5: Entry into and completion of FVB-school: robustness test

Table S1: Entry requirements into FVB1 and FVB2 school in Swiss cantons

| Canton                        | Entry requirement FVB1                                                                                            | Entry requirement FVB2*                                                                       | FVB profiles**                                                 |
|-------------------------------|-------------------------------------------------------------------------------------------------------------------|-----------------------------------------------------------------------------------------------|----------------------------------------------------------------|
| Appenzell<br>Inner-<br>Rhodes | no FVB1 school, criteria of Appenzell Outer-<br>Rhodes or St. Gall apply for most of its<br>students <sup>c</sup> | no FVB1 school, criteria of St. Gall or<br>Zurich apply for most of its students <sup>c</sup> | no FVB school                                                  |
| Appenzell<br>Outer-<br>Rhodes | Mandatory entrance exam (in combinatin<br>with grade average)                                                     | no FVB1 school, criteria of St. Gall or<br>Zurich apply for most of its students <sup>c</sup> | BS (only FVB1)                                                 |
| Argovia                       | Grade average (or entrance exam)                                                                                  | Mandatory entrance exam                                                                       | TALS, BS, ARTS, HESO, NLF                                      |
| Basle-City                    | Grade average (or entrance exam)                                                                                  | Grade average (or entrance exam)                                                              | TALS, BS, ARTS, HESO (only FVB1)                               |
| Basle-<br>Country             | Grade average (or entrance exam)                                                                                  | Grade average (or entrance exam)                                                              | TALS, BS (for FVB2 only track business),<br>HESO               |
| Berne                         | Teacher recommendation (or entrance<br>exam)                                                                      | Passing of preparatory course (or<br>entrance exam)                                           | TALS, BS, ARTS, HESO, NLF (only FVB2)                          |
| Friburg                       | Grade average (or entrance exam)                                                                                  | Passing of preparatory course (or<br>entrance exam)                                           | TALS, BS, ARTS (only FVB1), HESO, NLF<br>(only FVB2)           |
| Geneva                        | Grade average (or entrance exam)                                                                                  | Mandatory entrance exam                                                                       | TALS, BS (for FVB1 only type business),<br>ARTS, HESO, NLF     |
| Glarus                        | Mandatory entrance exam                                                                                           | Grade average (or entrance exam)                                                              | TALS (only FVB1), BS (only type business),<br>HESO (only FVB1) |
| Grisons                       | Mandatory entrance exam                                                                                           | Mandatory entrance exam in<br>combination with grade average <sup>a</sup>                     | TALS, BS (only type business), ARTS,<br>HESO, NLF (only FVB2)  |
| Jura <sup>d</sup>             | Grade average (or entrance exam)                                                                                  | Grade average (or entrance exam)                                                              | TALS, BS (for FVB1 only type business),<br>HESO                |
| Lucerne                       | Grade average (or entrance exam)                                                                                  | Mandatory entrance exam                                                                       | TALS, BS, ARTS, HESO, NLF (only FVB2)                          |
| Neuchâtel                     | Grade average (or entrance exam)                                                                                  | Passing of preparatory course (or<br>entrance exam)                                           | TALS, BS (only type business), ARTS,<br>HESO, NLF (only FVB2)  |
| Nidwald                       | Grade average (or entrance exam)                                                                                  | Grade average (or entrance exam) <sup>b</sup>                                                 | BS (only FVB1 and only type business)                          |
| Obwald                        | Grade average (or entrance exam) <sup>b</sup>                                                                     | Grade average (or entrance exam)                                                              | TALS, BS, HESO (all types only FVB2)                           |

|             |                                           |                                                                     |                                                                           |
|-------------|-------------------------------------------|---------------------------------------------------------------------|---------------------------------------------------------------------------|
| Schaffhouse | Mandatory entrance exam                   | Mandatory admission interview and (potentially) additional criteria | TALS, BS (for FVB1 only type business), HESO (only FVB2)                  |
| Schwyz      | Mandatory entrance exam                   | Mandatory entrance exam                                             | TALS, BS (only type business), HESO (only FVB2)                           |
| Soleure     | Grade average (or entrance exam)          | Passing of preparatory course (or entrance exam)                    | TALS, BS (for FVB1 only type business), Arts (only FVB2), HESO            |
| St. Gall    | Mandatory entrance exam                   | Mandatory entrance exam                                             | TALS, BS, ARTS, HESO, NLF (only FVB2)                                     |
| Tessin      | Grade average (or entrance exam)          | Mandatory admission interview and (potentially) additional criteria | TALS, BS, ARTS, HESO, NLF                                                 |
| Thurgovia   | Mandatory entrance exam                   | Grade average and teacher recommendation (or entrance exam)         | TALS, BS (for FVB1 only type business), ARTS, HESO, NLF (only FVB2)       |
| Uri         | Grade average (or entrance exam)          | Mandatory entrance exam                                             | TALS (only FVB2), BS (only FVB1 and only type business), HESO (only FVB2) |
| Vaud        | Grade average (or entrance exam)          | Mandatory entrance exam                                             | TALS, BS, ARTS, HESO, NLF (only FVB2)                                     |
| Wallis      | Grade average (or entrance exam)          | Grade average (or entrance exam)                                    | TALS, BS (for FVB1 only type business), ARTS, HESO (only FVB1)            |
| Zug         | Teacher recommendation (or entrance exam) | Mandatory entrance exam                                             | TALS, BS (for FVB1 only type business), HESO (only FVB2)                  |
| Zurich      | Mandatory entrance exam                   | Mandatory entrance exam                                             | TALS, BS, ARTS, HESO, NLF                                                 |

Notes: \* Entry requirements for FVB2 type "Economy" differs. In all cantons access without examinations is possible for apprentices of commercial education as long as they fulfill a certain grade average.

\*\* FVB types: Technic, Architecture, life sciences (TALS), Business and Services (BS; includes subtypes business and services), Design and Arts (ARTS), Health and Social Occupations (HESO), Nature, Landscape, Food (NLF)

a) Entry requirements for type GESO differs as well

b) Despite not having a FVB1 school, the canton specifies admission criteria for its students

c) since we eventually code Appenzell Outer-Rhodes and St. Gall into the same category (mandatory entrance exam) this poses no problem

d) Canton of Jura not included into analyses

Table S2: Individual and contextual determinants for entry into FVB1- and FVB2-school (regression results)

|                                                              | FVB1     |          |          |          | FVB2     |          |         |
|--------------------------------------------------------------|----------|----------|----------|----------|----------|----------|---------|
|                                                              | (1)      | (2)      | (3)      | (4)      | (5)      | (6)      | (7)     |
| <i>Entry requirements FVB, Ref=mandatory entrance exam</i>   |          |          |          |          |          |          |         |
| Grade average                                                | 0.46*    | 0.05     | 0.58***  |          |          |          |         |
|                                                              | (0.23)   | (0.19)   | (0.11)   |          |          |          |         |
| Teacher recommendation                                       | -0.11    | -0.18*   | -0.24    |          |          |          |         |
|                                                              | (0.15)   | (0.08)   | (0.16)   |          |          |          |         |
| Admission interview                                          |          |          |          |          | 0.43***  | 0.42***  | 0.36*   |
|                                                              |          |          |          |          | (0.09)   | (0.05)   | (0.17)  |
| Preparatory course                                           |          |          |          |          | 0.22**   | 0.23***  | 0.27*** |
|                                                              |          |          |          |          | (0.07)   | (0.02)   | (0.07)  |
| Grade average/Teacher Recommendation                         |          |          |          |          | 0.11     | 0.11***  | 0.06    |
|                                                              |          |          |          |          | (0.08)   | (0.03)   | (0.09)  |
| Admission without entry exam (Dummy)                         |          |          |          | 0.54***  |          |          |         |
|                                                              |          |          |          | (0.15)   |          |          |         |
| Women                                                        | -0.27*** | -0.24**  | -0.26**  | -0.28**  | 0.02     | 0.02     | 0.02    |
|                                                              | (0.07)   | (0.07)   | (0.10)   | (0.10)   | (0.03)   | (0.02)   | (0.06)  |
| Swiss                                                        | 0.16     | 0.23*    | 0.09     | -0.03    | -0.01    | -0.01    | -0.26** |
|                                                              | (0.12)   | (0.11)   | (0.17)   | (0.17)   | (0.04)   | (0.03)   | (0.09)  |
| Age at IVET beginning                                        | -0.49*** | -0.44*** | -0.46*** | -0.47*** | -0.17*** | -0.15*** | -0.10*  |
|                                                              | (0.11)   | (0.09)   | (0.08)   | (0.08)   | (0.04)   | (0.01)   | (0.04)  |
| High SES                                                     |          |          | 0.48***  | 0.68***  |          |          | 0.27*** |
|                                                              |          |          | (0.10)   | (0.18)   |          |          | (0.06)  |
| School track with additional requirements in lower education | 1.76***  | 2.00***  | 1.82***  | 1.85***  | 0.78***  | 0.75***  | 0.72*** |
|                                                              | (0.28)   | (0.26)   | (0.21)   | (0.21)   | (0.08)   | (0.03)   | (0.09)  |
| Academic requirements of training occupation                 | 0.15***  | 0.15***  | 0.16***  | 0.16***  | 0.05***  | 0.05***  | 0.03*** |
|                                                              | (0.01)   | (0.01)   | (0.01)   | (0.01)   | (0.01)   | (0.00)   | (0.01)  |
| General baccalaureate (quota)                                |          | 4.11***  |          |          |          | 0.20*    |         |
|                                                              |          | (1.23)   |          |          |          | (0.11)   |         |
| High SES*admission without                                   |          |          | -0.38*   |          |          |          |         |
|                                                              |          |          | (0.21)   |          |          |          |         |
| Constant                                                     | -2.71    | -4.54**  | -4.06**  | -3.69**  | -1.29*** | -1.46*** | -1.56*  |
|                                                              | (2.05)   | (1.72)   | (1.31)   | (1.34)   | (0.38)   | (0.22)   | (0.74)  |
| Observations                                                 | 40228    | 40228    | 4654     | 4616     | 39518    | 39518    | 4594    |
| Observations (second step)                                   |          |          |          |          | 35209    | 35209    |         |
| Pseudo-R2                                                    | 0.264    | 0.277    |          |          |          |          |         |
| Athrho                                                       |          |          |          |          | -0.21    | -0.02    | 0.38    |
|                                                              |          |          |          |          | (0.39)   | (0.09)   | (0.24)  |

Notes: Clustered standard errors (canton) in parentheses: +  $p < 0.10$ , \*  $p < 0.05$ , \*\*  $p < 0.01$ , \*\*\*  $p < 0.001$ ; Models 1-4 are logistic regression models, models 5-7 on entry into FVB2 are Heckman models; Step 2 is presented here. Models 3, 4, and 7 include weights to adjust for the fact that information on SES is only available for a subset of the sample.

Table S3: Individual and contextual determinants for the successful completion of FVB1 and FVB2 (Heckprobit models)

| Step 2                                                                 | FVB1 completion   |                   |          |                   | FVB2-completion |
|------------------------------------------------------------------------|-------------------|-------------------|----------|-------------------|-----------------|
|                                                                        | (1)               | (2)               | (3)      | (4)               | (5)             |
| <i>Entry requirements FVB, Ref=mandatory entrance exam</i>             |                   |                   |          |                   |                 |
| Grade average                                                          | 0.16*             | 0.15 <sup>+</sup> | 0.25*    |                   |                 |
|                                                                        | (0.07)            | (0.08)            | (0.10)   |                   |                 |
| Teacher recommendation                                                 | 0.15              | 0.13              | 0.02     |                   |                 |
|                                                                        | (0.10)            | (0.09)            | (0.17)   |                   |                 |
| Admission interview                                                    |                   |                   |          |                   | 0.43***         |
|                                                                        |                   |                   |          |                   | (0.06)          |
| Preparatory course                                                     |                   |                   |          |                   | 0.29***         |
|                                                                        |                   |                   |          |                   | (0.06)          |
| Grade average/Teacher recommendation                                   |                   |                   |          |                   | 0.16**          |
|                                                                        |                   |                   |          |                   | (0.05)          |
| Admission without entry exam (dummy)                                   |                   |                   |          | 0.25 <sup>+</sup> |                 |
|                                                                        |                   |                   |          | (0.14)            |                 |
| Women                                                                  | 0.24***           | 0.22**            | 0.17     | 0.20 <sup>+</sup> | 0.09            |
|                                                                        | (0.06)            | (0.08)            | (0.12)   | (0.12)            | (0.06)          |
| Swiss                                                                  | 0.17 <sup>+</sup> | 0.22*             | 0.49**   | 0.49**            | 0.06            |
|                                                                        | (0.09)            | (0.09)            | (0.17)   | (0.18)            | (0.06)          |
| Age at IVET beginning                                                  | -0.20***          | -0.23***          | -0.24*** | -0.23**           | -0.20***        |
|                                                                        | (0.05)            | (0.06)            | (0.07)   | (0.08)            | (0.03)          |
| Socio-Economic Background                                              |                   |                   | 0.24*    | 0.28 <sup>+</sup> |                 |
|                                                                        |                   |                   | (0.10)   | (0.16)            |                 |
| School track with additional requirements in lower secondary education | 0.99***           | 0.95***           | 1.00***  | 0.98***           | 0.79***         |
|                                                                        | (0.16)            | (0.17)            | (0.20)   | (0.22)            | (0.05)          |
| Intellectual requirements of training occupation                       | 0.04*             | 0.04*             | 0.06***  | 0.05***           | 0.04***         |
|                                                                        | (0.02)            | (0.02)            | (0.01)   | (0.01)            | (0.01)          |
| Drop out (Termination of training contract)                            |                   | -0.60***          | -0.55**  | -0.60**           |                 |
|                                                                        |                   | (0.07)            | (0.19)   | (0.19)            |                 |
| SES* Entry without mandatory exam                                      |                   |                   |          | -0.10             |                 |
|                                                                        |                   |                   |          | (0.20)            |                 |
| Constant                                                               | -0.02             | 0.38              | -1.12    | -0.81             | -0.19           |
|                                                                        | (1.17)            | (1.43)            | (1.24)   | (1.29)            | (1.31)          |
| Athrho                                                                 | 0.38              | 0.47              | 0.96*    | 0.78*             | 1.37            |
|                                                                        | (0.29)            | (0.39)            | (0.40)   | (0.32)            | (0.95)          |
| Observations (first step)                                              | 40228             | 39873             | 4602     | 4564              | 34326           |
| Observations (second step)                                             | 5982              | 5627              | -        | -                 | 4876            |

Notes: Clustered standard errors (canton) in parentheses: \*  $p < 0.10$ , \*  $p < 0.05$ , \*\*  $p < 0.01$ , \*\*\*  $p < 0.001$ . The second step of the Heckprobit models includes the selection of students who initially participated in FVB-training. Models 3 and 4 include weights to adjust for the fact that information on SES is only available for a subset of the sample.

Table S4: Individual and contextual determinants for entry into FVB2-school (logistic regression models)

|                                                                        | Entry into FVB2    |                    |                   |
|------------------------------------------------------------------------|--------------------|--------------------|-------------------|
|                                                                        | (1)                | (2)                | (3)               |
| Admission interview                                                    | 0.81***<br>(0.10)  | 0.78***<br>(0.10)  | 0.65*<br>(0.33)   |
| Preparatory course                                                     | 0.42**<br>(0.15)   | 0.42**<br>(0.15)   | 0.49***<br>(0.13) |
| Grade average/ Teacher recommendation                                  | 0.18<br>(0.18)     | 0.17<br>(0.19)     | 0.11<br>(0.18)    |
| Women                                                                  | 0.05<br>(0.04)     | 0.05<br>(0.04)     | 0.09<br>(0.11)    |
| Swiss                                                                  | -0.02<br>(0.07)    | -0.02<br>(0.07)    | -0.40*<br>(0.18)  |
| Age at IVET beginning                                                  | -0.27***<br>(0.03) | -0.27***<br>(0.03) | -0.24**<br>(0.08) |
| Socio-Economic Background                                              |                    |                    | 0.51***<br>(0.11) |
| School track with additional requirements in lower secondary education | 1.44***<br>(0.13)  | 1.44***<br>(0.13)  | 1.46***<br>(0.18) |
| Academic requirements of training occupation                           | 0.08***<br>(0.00)  | 0.08***<br>(0.00)  | 0.08***<br>(0.01) |
| General baccalaureate (quota)                                          |                    | 0.27<br>(0.48)     |                   |
| Constant                                                               | -2.57***<br>(0.43) | -2.65***<br>(0.51) | -2.60*<br>(1.36)  |
| Observations                                                           | 35470              | 35470              | 4025              |
| Pseudo $R^2$                                                           | 0.156              | 0.156              |                   |

Notes: Clustered standard errors (canton) in parentheses: +  $p < 0.10$ , \*  $p < 0.05$ , \*\*  $p < 0.01$ , \*\*\*  $p < 0.001$ ; Models 5-7 on entry into FVB2 school exclude individuals who already obtained a FVB1 during their IVET. Models 3, 4, and 7 include weights to adjust for the fact that information on SES is only available for a subset of the sample.

Table S5: Entry into and completion of FVB-school: robustness tests

|                                                            | (1)                         | (2)                         | (3)                         | (4)                         | (5)                         | (6)                         | (7)                         | (8)                         |
|------------------------------------------------------------|-----------------------------|-----------------------------|-----------------------------|-----------------------------|-----------------------------|-----------------------------|-----------------------------|-----------------------------|
|                                                            | Entry                       | FVB1-<br>Graduation         | Graduation                  | Entry                       | Graduation                  | FVB2-<br>Graduation         | Entry                       | Graduation                  |
| <i>Entry requirements FVB, Ref=mandatory entrance exam</i> |                             |                             |                             |                             |                             |                             |                             |                             |
| Grade average                                              | 0.40 <sup>+</sup><br>(0.24) | 0.13 <sup>+</sup><br>(0.07) | 0.42 <sup>*</sup><br>(0.19) |                             |                             |                             |                             |                             |
| Teacher recommendation                                     | -0.15<br>(0.17)             | 0.10<br>(0.10)              | -0.06<br>(0.16)             |                             |                             |                             |                             |                             |
| Admission interview                                        |                             |                             |                             | 0.65***<br>(0.14)           | 0.41***<br>(0.06)           | 0.82***<br>(0.09)           | 0.71***<br>(0.13)           | 0.41***<br>(0.04)           |
| Preparatory course                                         |                             |                             |                             | 0.36 <sup>*</sup><br>(0.16) | 0.28***<br>(0.05)           | 0.46***<br>(0.13)           | 0.38 <sup>*</sup><br>(0.15) | 0.29***<br>(0.05)           |
| Grade average/teacher recommendation                       |                             |                             |                             | 0.08<br>(0.17)              | 0.14**<br>(0.05)            | 0.21<br>(0.15)              | 0.13<br>(0.16)              | 0.18***<br>(0.05)           |
| Women                                                      | -0.05<br>(0.04)             | 0.09<br>(0.06)              | -0.07<br>(0.05)             | -0.06<br>(0.04)             | 0.02<br>(0.06)              | 0.08 <sup>*</sup><br>(0.04) | 0.07<br>(0.04)              | 0.08<br>(0.05)              |
| Swiss                                                      | 0.22 <sup>*</sup><br>(0.11) | 0.21**<br>(0.08)            | 0.24 <sup>+</sup><br>(0.14) | 0.07<br>(0.06)              | 0.10 <sup>*</sup><br>(0.05) | 0.03<br>(0.07)              | -0.05<br>(0.06)             | 0.08<br>(0.05)              |
| Age at VET beginning                                       | -0.52***<br>(0.11)          | -0.22***<br>(0.04)          | -0.51***<br>(0.11)          | -0.28***<br>(0.03)          | -0.21***<br>(0.03)          | -0.31***<br>(0.03)          | -0.25***<br>(0.03)          | -0.20***<br>(0.02)          |
| Lower Secondary Track with add.<br>requirements            | 2.12***<br>(0.32)           | 1.14***<br>(0.14)           | 2.22***<br>(0.30)           | 1.54***<br>(0.11)           | 0.89***<br>(0.05)           | 1.49***<br>(0.13)           | 1.33***<br>(0.11)           | 0.78***<br>(0.05)           |
| Academic requirements of training occ.                     |                             |                             | 0.14***<br>(0.01)           |                             |                             | 0.08***<br>(0.01)           | 0.09***<br>(0.00)           | 0.04***<br>(0.01)           |
| Constant                                                   | 5.19**<br>(1.95)            | 2.33***<br>(0.59)           | -2.92<br>(2.18)             | 2.19***<br>(0.44)           | 2.16**<br>(0.70)            | -2.21***<br>(0.47)          | -2.82***<br>(0.39)          | 0.19<br>(1.13)              |
| Observations                                               | 40504                       | 40504                       | 40228                       | 36157                       | 34990                       | 34466                       | 34792                       | 33679                       |
| Pseudo R <sup>2</sup>                                      | 0.260                       |                             | 0.248                       | 0.152                       |                             | 0.151                       | 0.154                       |                             |
| Fixed effects for occupation fields                        | yes                         | yes                         |                             | yes                         | yes                         |                             |                             |                             |
| Without canton of Grisons                                  |                             |                             |                             |                             |                             |                             | yes                         | yes                         |
| Logistic regression model                                  |                             |                             | yes                         |                             |                             | yes                         |                             |                             |
| Athrho                                                     |                             | 0.52 <sup>+</sup><br>(0.29) |                             |                             | 1.26 <sup>+</sup><br>(0.75) |                             |                             | 1.10 <sup>+</sup><br>(0.59) |

Clustered standard errors in parentheses: <sup>+</sup>  $p < 0.10$ , <sup>\*</sup>  $p < 0.05$ , <sup>\*\*</sup>  $p < 0.01$ , <sup>\*\*\*</sup>  $p < 0.001$
